# Supplementary material
Source: PubMed Central journal article supplement (PMC5695732)
Supplement: Supp_Tables1-3.pdf [file Supp_Tables1-3.pdf]

## Supplementary Data

**Table S1. Association between NEWS-Y Subscales and Children's Physical Activity and BMI with NEWS-Y and Gender Interaction Effects**

| <b>NEWS-Y Scale</b>                     | <b>Minutes per week of vigorous activity</b> | <b>Minutes per week of moderate activity</b> | <b>BMI Z-score</b>    |
|-----------------------------------------|----------------------------------------------|----------------------------------------------|-----------------------|
| A. Land-Use Mix: Diversity              | -6.22 (-24.428, 11.993)                      | -2.81 (-19.540, 13.927)                      | -0.02 (-0.185, 0.142) |
| Land-Use Mix: Diversity × Female        | 13.10 (-14.432, 40.641)                      | 14.39 (-10.989, 39.765)                      | 0.15 (-0.101, 0.395)  |
| B. Neighborhood Recreation Facilities   | 25.68* (6.026, 45.334)                       | 20.99* (3.127, 38.847)                       | 0.07 (-0.095, 0.244)  |
| Recreation Facilities × Female          | -27.48 (-54.958, 0.005)                      | -12.49 (-37.530, 12.556)                     | 0.02 (-0.216, 0.259)  |
| C. Residential Density                  | -1.92 (-21.000, 17.161)                      | -0.83 (-18.262, 16.611)                      | 0.03 (-0.138, 0.205)  |
| Residential Density × Female            | -10.79 (-37.777, 16.204)                     | -12.21 (-36.921, 12.500)                     | -0.18 (-0.419, 0.063) |
| D. Land-Use Mix: Access                 | -1.19 (-20.854, 18.471)                      | 7.62 (-10.419, 25.656)                       | -0.07 (-0.245, 0.101) |
| Land-Use Mix: Access × Female           | 4.05 (-23.020, 31.112)                       | 0.56 (-24.278, 25.390)                       | 0.09 (-0.149, 0.325)  |
| E. Street Connectivity                  | -8.22 (-27.186, 10.753)                      | 3.39 (-13.984, 20.765)                       | -0.07 (-0.239, 0.096) |
| Street Connectivity × Female            | 1.36 (-25.490, 28.217)                       | -17.37 (-41.989, 7.257)                      | 0.11 (-0.127, 0.345)  |
| F. Walking/cycling Facilities           | 2.61 (-16.574, 21.803)                       | 5.24 (-12.351, 22.833)                       | -0.07 (-0.238, 0.100) |
| Walking/cycling Facilities × Female     | 3.03 (-23.906, 29.956)                       | -8.44 (-33.175, 16.292)                      | 0.08 (-0.161, 0.314)  |
| G. Neighborhood Aesthetics              | 5.01 (-13.874, 23.899)                       | -2.12 (-19.567, 15.326)                      | -0.01 (-0.182, 0.155) |
| Neighborhood Aesthetics × Female        | -1.35 (-27.944, 25.248)                      | 3.54 (-20.958, 28.040)                       | -0.05 (-0.287, 0.185) |
| H. Pedestrian/automobile Traffic Safety | 10.23 (-8.731, 29.199)                       | 16.51 (-0.855, 33.876)                       | -0.08 (-0.244, 0.089) |
| Traffic Safety × Female                 | -23.36 (-50.196, 3.476)                      | -13.83 (-38.307, 10.648)                     | 0.15 (-0.083, 0.387)  |
| I. Crime Safety                         | 19.27 (-0.545, 39.087)                       | 13.17 (-5.135, 31.482)                       | 0.04 (-0.138, 0.214)  |
| Crime Safety × Female                   | -15.62 (-42.358, 11.117)                     | -3.08 (-27.754, 21.596)                      | -0.09 (-0.333, 0.143) |

All regressions were adjusted for socio-demographic covariates. Figures in parentheses are standard errors.

\*\* $p < 0.01$ , \* $p < 0.05$ .

**Table S2. Association between NEWS-Y Subscales and Children’s Physical Activity and BMI by On- and Off-Post – Controlling for Installation Fixed Effects**

| NEWS-Y Scale                            | On-Post                           |                                   |                          | Off-Post                                     |                                         |                          |
|-----------------------------------------|-----------------------------------|-----------------------------------|--------------------------|----------------------------------------------|-----------------------------------------|--------------------------|
|                                         | Minutes/Week of vigorous activity | Minutes/Week of moderate activity | BMI Z-score              | Minutes/Week of vigorous activity            | Minutes/Week of moderate activity       | BMI Z-score              |
| A. Land-Use Mix: Diversity              | 6.36<br>(-16.366, 29.091)         | 12.97<br>(-7.568, 33.516)         | -0.00<br>(-0.211, 0.207) | -5.86<br>(-23.082, 11.357)                   | -2.85<br>(-18.714, 13.008)              | 0.07<br>(-0.084, 0.225)  |
| B. Neighborhood Recreation Facilities   | 8.01<br>(-17.921, 33.936)         | 18.29<br>(-4.657, 41.235)         | 0.03<br>(-0.197, 0.265)  | 16.78<br>(-1.222, 34.777)                    | <b>18.10*</b><br><b>(1.503, 34.701)</b> | 0.10<br>(-0.049, 0.246)  |
| C. Residential Density                  | 2.59<br>(-21.811, 26.998)         | 1.45<br>(-20.437, 23.333)         | -0.08<br>(-0.298, 0.135) | -19.03<br>(-38.277, 0.210)                   | -11.82<br>(-29.556, 5.916)              | -0.08<br>(-0.261, 0.095) |
| D. Land-Use Mix: Access                 | 15.06<br>(-9.626, 39.738)         | 14.40<br>(-7.938, 36.739)         | -0.00<br>(-0.219, 0.216) | -8.61<br>(-25.720, 8.504)                    | 7.84<br>(-8.121, 23.796)                | -0.03<br>(-0.185, 0.120) |
| E. Street Connectivity                  | 16.35<br>(-6.288, 38.994)         | 5.02<br>(-15.392, 25.441)         | 0.02<br>(-0.176, 0.223)  | <b>-31.58**</b><br><b>(-49.823, -13.345)</b> | -13.14<br>(-30.286, 4.000)              | -0.09<br>(-0.252, 0.076) |
| F. Walking/cycling Facilities           | 19.28<br>(-11.085, 49.636)        | 18.48<br>(-8.759, 45.711)         | -0.14<br>(-0.406, 0.129) | -4.91<br>(-22.576, 12.759)                   | -5.61<br>(-22.109, 10.887)              | 0.06<br>(-0.094, 0.223)  |
| G. Neighborhood Aesthetics              | 19.42<br>(-2.719, 41.556)         | 5.25<br>(-14.767, 25.269)         | -0.03<br>(-0.224, 0.170) | -4.39<br>(-22.318, 13.540)                   | -0.04<br>(-16.797, 16.722)              | -0.08<br>(-0.242, 0.081) |
| H. Pedestrian/automobile Traffic Safety | -2.95<br>(-25.528, 19.633)        | 9.01<br>(-11.084, 29.100)         | 0.02<br>(-0.179, 0.221)  | -3.89<br>(-21.530, 13.755)                   | 6.95<br>(-9.346, 23.251)                | -0.00<br>(-0.157, 0.151) |
| I. Crime Safety                         | 13.14<br>(-8.557, 34.829)         | 16.67<br>(-2.831, 36.174)         | 0.01<br>(-0.187, 0.203)  | 7.81<br>(-10.329, 25.946)                    | 0.33<br>(-16.648, 17.310)               | -0.07<br>(-0.229, 0.094) |

All regressions were adjusted for socio-demographic covariates. Figures in parentheses are 95% confidence intervals.

\*\*p < 0.01, \*p < 0.05.

**Table S3. Association between NEWS-Y Subscales and Children’s Physical Activity and BMI by On- and Off-Post – Controlling for Region Fixed Effects**

| NEWS-Y Scale                            | On-Post                           |                                         |                          | Off-Post                                     |                                         |                          |
|-----------------------------------------|-----------------------------------|-----------------------------------------|--------------------------|----------------------------------------------|-----------------------------------------|--------------------------|
|                                         | Minutes/Week of vigorous activity | Minutes/Week of moderate activity       | BMI Z-score              | Minutes/Week of vigorous activity            | Minutes/Week of moderate activity       | BMI Z-score              |
| A. Land-Use Mix: Diversity              | 5.51<br>(-16.790, 27.802)         | 10.75<br>(-9.872, 31.379)               | 0.02<br>(-0.187, 0.221)  | -6.16<br>(-23.335, 11.009)                   | -3.48<br>(-19.128, 12.173)              | 0.07<br>(-0.084, 0.223)  |
| B. Neighborhood Recreation Facilities   | 3.23<br>(-21.846, 28.305)         | 13.58<br>(-9.268, 36.425)               | 0.09<br>(-0.135, 0.314)  | 17.26<br>(-0.268, 34.796)                    | <b>17.92*</b><br><b>(1.823, 34.019)</b> | 0.08<br>(-0.070, 0.221)  |
| C. Residential Density                  | -0.40<br>(-22.928, 22.130)        | -4.23<br>(-24.998, 16.535)              | -0.04<br>(-0.244, 0.156) | -15.65<br>(-34.762, 3.461)                   | -10.60<br>(-28.024, 6.831)              | -0.08<br>(-0.258, 0.093) |
| D. Land-Use Mix: Access                 | 12.92<br>(-10.443, 36.276)        | 10.12<br>(-11.500, 31.747)              | -0.04<br>(-0.243, 0.168) | -6.42<br>(-23.319, 10.486)                   | 8.13<br>(-7.496, 23.753)                | -0.05<br>(-0.202, 0.098) |
| E. Street Connectivity                  | 13.20<br>(-8.365, 34.758)         | 1.90<br>(-18.052, 21.859)               | 0.02<br>(-0.168, 0.213)  | <b>-24.91***</b><br><b>(-42.728, -7.094)</b> | -10.36<br>(-26.860, 6.140)              | -0.09<br>(-0.246, 0.072) |
| F. Walking/cycling Facilities           | 16.89<br>(-12.749, 46.534)        | 20.95<br>(-6.361, 48.265)               | -0.11<br>(-0.365, 0.155) | 1.36<br>(-14.445, 17.162)                    | -3.70<br>(-18.321, 10.915)              | -0.00<br>(-0.145, 0.138) |
| G. Neighborhood Aesthetics              | 16.87<br>(-4.578, 38.313)         | 5.19<br>(-14.719, 25.094)               | -0.01<br>(-0.205, 0.176) | -9.84<br>(-26.874, 7.198)                    | -2.35<br>(-18.127, 13.432)              | -0.05<br>(-0.201, 0.105) |
| H. Pedestrian/automobile Traffic Safety | -4.22<br>(-26.048, 17.604)        | 10.86<br>(-9.129, 30.842)               | 0.03<br>(-0.161, 0.229)  | -3.21<br>(-20.702, 14.287)                   | 7.68<br>(-8.342, 23.710)                | -0.00<br>(-0.156, 0.148) |
| I. Crime Safety                         | 12.36<br>(-8.549, 33.275)         | <b>21.28*</b><br><b>(2.027, 40.535)</b> | 0.02<br>(-0.169, 0.208)  | 7.16<br>(-10.854, 25.175)                    | 1.04<br>(-15.680, 17.751)               | -0.07<br>(-0.226, 0.092) |

All regressions were adjusted for socio-demographic covariates including Census Region (West, Midwest, Northeast, and South). Figures in parentheses are 95% confidence intervals.  
 \*\*\*p < 0.01, \*p < 0.05.
